# Supplementary material for: Monolithic integrated emitting-detecting configuration based on strained Ge microbridge
Source: publisher site journal article supplement (doi:10.1515/nanoph-2021-0122), 2021-08-13
Supplement: Supplementary file 1 [file j_nanoph-2021-0122_suppl_001.pdf]

# Monolithic integrated emitting-detecting configuration based on strained Ge microbridge

Senbiao Qin, Junqiang Sun,\* Jialin Jiang, Yi Zhang, Ming Cheng, Linfeng Yu, Kang Wang, Li Kai, Haotian Shi and Qiang Huang

Wuhan National Laboratory for Optoelectronics, School of Optics and Electronic Information, Huazhong University of Science and Technology, Wuhan 430074, China

\*Corresponding author: Junqiang Sun, E-mail: jqsun@hust.edu.cn

This file contains:

1. Ion implantations
2. Strain characterization
3. Joint density of state (JDOS) model
4. Theoretical spontaneous emission and absorption spectrum
5. Calculation of electron statistics
6. Thermal stress and strain-enhancement factor related to dimensions
7. [Calculation methods of the emission efficiency and responsivity](#)
8. Reverse bias dependence of the detecting microbridge
9. Electrical circuit of the emitting-detecting test
10. Material inhomogeneity at the edge of the microbridge structure
11. Material parameters used in the carrier density simulation
12. Simulation of joule heating effect
13. References

## 1. Ion implantations

$\text{BF}_2^+$  and  $\text{P}^+$  implantations are performed to construct the lateral p-i-n junctions. Implantation parameters are listed in Table S1. As shown in Fig. S1, the concentrations of active dopants present Gaussian distribution for both n-type and p-type. After the annealing process, the active concentration in the p-region is on the order of  $10^{20} \text{ cm}^{-3}$ . For the p-region, the high diffusivity of phosphorus in Ge limits the active concentration to the order of  $10^{19} \text{ cm}^{-3}$  [1].

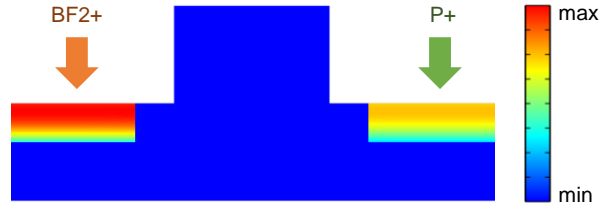

Figure S1. Active dopants concentration (logarithmic scale).

Table S1. Parameters of  $\text{BF}_2^+$  and  $\text{P}^+$  implantations

| Ion                             | Implanted dose/ $\text{cm}^{-2}$ | Energy/keV | Angle/ $^\circ$ | Projected Range/nm | Junction depth/nm |
|---------------------------------|----------------------------------|------------|-----------------|--------------------|-------------------|
| $\text{BF}_2^+$ (p-type doping) | $2 \times 10^{15}$               | 50         | 7               | 40                 | 200               |
| $\text{P}^+$ (n-type doping)    | $2 \times 10^{15}$               | 40         | 7               | 40                 | 200               |

## 2. Strain characterization

X-ray diffraction (XRD) and Raman spectroscopy are performed for characterization of the strain. Figure S2(a) shows the X-ray rocking curve of the as-grown Ge <004> lattice planes, with a Ge peak locating at  $66.107^\circ$  and a full width at half maximum (FWHM) of  $0.0817^\circ$ . The biaxial tensile strain in the as-grown Ge layer is determined from the location of the Ge peak in the X-ray rocking curve. For the given Ge <004> lattice planes with an inter-plane distance of  $d_{004}$ , the condition for a diffraction peak to occur can be determined by the Bragg's law:

$$2d \sin \theta = n\lambda \quad (S1)$$

where  $\theta$  is the diffraction angle.  $n$  is an integer representing the order of the diffraction peak.  $\lambda = 0.15406$  nm is the wavelength of the X-ray. A diffraction peak of Ge locating at  $2\theta = 66.107^\circ$  represents an inter-plane distance of  $1.4123$  Å. Due to the tetragonal crystal structure, the inter-plane distance of the <001> crystal orientation  $d_{001}$  can be derived as follows:

$$d_{hkl}^2 = \frac{1}{(h^2 + k^2 + l^2)} \times d_{001}^2 \quad (S2)$$

Here,  $h$ ,  $k$  and  $l$  are Miller indices.  $d_{001} = 5.6492$  Å, indicating a compressive strain of 0.156% in the  $z$  direction comparing with the lattice constant of 5.658 Å in the relaxed Ge layer. The relationship between strain components of  $\varepsilon_{xx}$ ,  $\varepsilon_{yy}$  and  $\varepsilon_{zz}$  can be described as the following equations:

$$\varepsilon_{xx} = \varepsilon_{yy} \quad (S3)$$

$$\varepsilon_{zz} = -\frac{2C_{12}}{C_{11}} \varepsilon_{xx} \quad (S4)$$

Here, elastic constants  $C_{11}$  and  $C_{12}$  are 128.53 GPa and 48.26 GPa in the Ge layer, respectively.

Raman spectroscopy results for the as-grown Ge and Ge microbridges with etching time of 15 min and 20 min are shown in Fig. S2(b), with Raman intensity peaks locating at  $307.9$   $\text{cm}^{-1}$ ,  $306.2$   $\text{cm}^{-1}$  and  $304.5$   $\text{cm}^{-1}$ , respectively. The relationship between the location of the Raman spectra and the strain value in Ge layer has been explored in ref. [2]:

$$\varepsilon = a \times \Delta\omega + b \times \Delta\omega^2 \quad (S5)$$

Here,  $a$  and  $b$  are coefficients with different values for biaxial and uniaxial tensile strain (see Table S2).

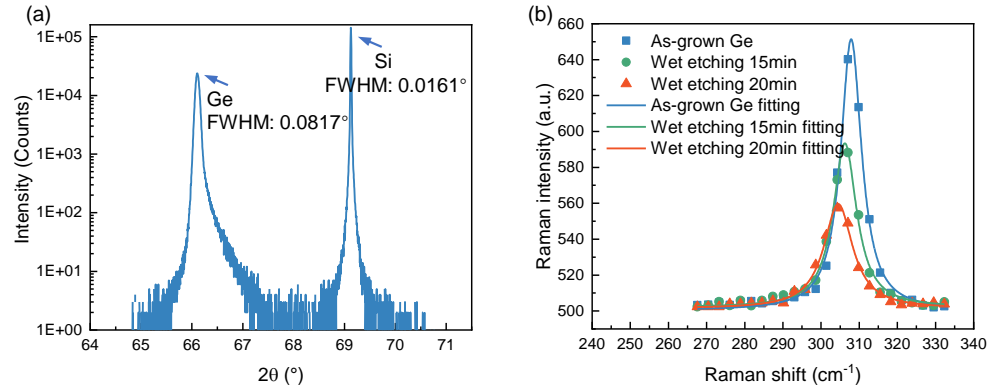

Figure S2. (a) The X-ray rocking curve of the as-grown Ge <004> lattice planes. The marked Ge peak is located at  $66.107^\circ$  with a full width at half maximum (FWHM) of  $0.0817^\circ$ . (b) The Raman spectroscopy of the as-grown Ge and Ge microbridge with wet etching of 15 min and 20 min for suspension. The Raman intensity peaks calculated by Lorentz fitting are located at  $307.9$   $\text{cm}^{-1}$ ,  $306.2$   $\text{cm}^{-1}$  and  $304.5$   $\text{cm}^{-1}$ , respectively.

The Raman peak of the relaxed bulk Ge was reported to be located at  $301.1$   $\text{cm}^{-1}$ , and the peak location of strained Ge should be smaller than relaxed Ge [2]. There is a deviation between the test result and the reported value, which results from the uncalibrated Raman spectroscopy

system. Here, data of XRD and Raman spectroscopy for as-grown Ge layer are compared to measure such deviation. The flow chart of the calibration of Raman spectroscopy system and strain calculation is shown in Fig. S3. The deviation is  $7.7 \text{ cm}^{-1}$ . The calibrated Raman peak locations of Ge microbridges with different wet etching time of 15min and 20min are  $298.5 \text{ cm}^{-1}$  and  $296.8 \text{ cm}^{-1}$ , corresponding to relative Raman shifts of  $2.6 \text{ cm}^{-1}$  and  $4.3 \text{ cm}^{-1}$ . According to Eq. S5, the values of uniaxial tensile strain of the two different Ge microbridges are 1.6% and 2.6%.

**Table S2. Coefficients in strain characterization with Raman spectroscopy**

| Strain type                                                                 | a    | b      |
|-----------------------------------------------------------------------------|------|--------|
| Biaxial tensile strain in x-y plane                                         | 0.23 | 0      |
| Uniaxial tensile strain in the lattice orientation of $\langle 100 \rangle$ | 0.68 | -0.019 |

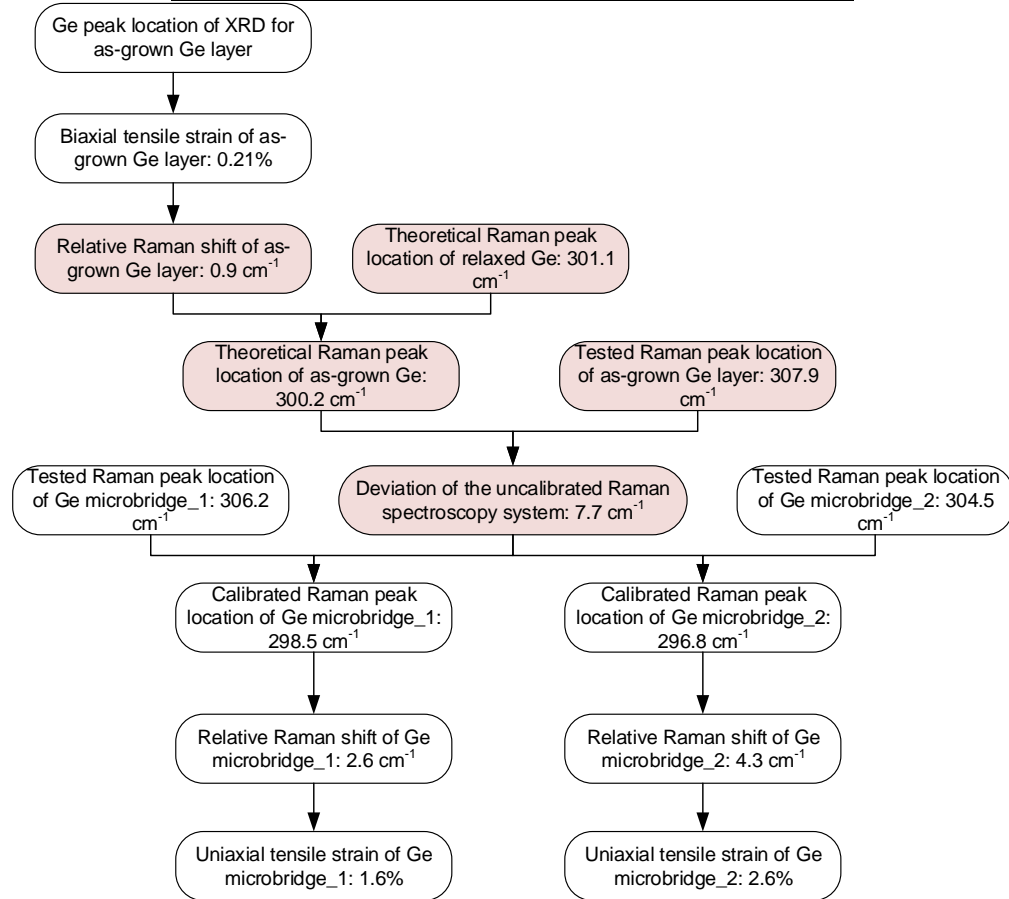

Figure S3. Flow chart of strain calculation and calibration of Raman spectroscopy system.

### 3. Joint density of state (JDOS) model

The spontaneous emission rate and interband absorption spectra are calculated by the joint density of state (JDOS) model:

$$r^{spont}(\hbar\omega) = \left( \frac{n_r^2 \omega^2}{\pi^2 \hbar c^2} \right) C_0 \left| \hat{e} \cdot p_{cv} \right|^2 \rho_r(\hbar\omega - E_g) f_c (1 - f_v) \quad (S6)$$

$$C_0 = \frac{\pi e^2}{n_r c \epsilon_0 m_0^2 \omega} \quad (S7)$$

$$\rho_r(\hbar\omega - E_g) = \frac{1}{2\pi^2} \left( \frac{2m_r^*}{\hbar^2} \right)^{3/2} (\hbar\omega - E_g)^{1/2} \quad (S8)$$

$$\alpha(\hbar\omega) = C_0 \left| \hat{e} \cdot p_{cv} \right|^2 \rho_r(\hbar\omega - E_g) \quad (S9)$$

where  $n_r$  is the refractive index.  $\omega$  is the angular frequency of the photon.  $\hbar$  is the reduced Planck constant.  $c$  is the light speed in the vacuum.  $e$  and  $m_0$  are the electron charge and mass, respectively.  $\epsilon_0$  is the permittivity in the vacuum.  $m_r$  is the reduced mass of electrons in conduction band.  $E_g$  is the bandgap.  $\left| \hat{e} \cdot p_{cv} \right|^2$  is the momentum matrix element.  $\rho_r(\hbar\omega - E_g)$  represents the joint density of state.  $f_c$  and  $f_v$  are the Fermi-Dirac functions of the conduction band and valence band, respectively. Both transitions for  $\Gamma$ -HH and  $\Gamma$ -LH have to be taken into consideration.

#### 4. Theoretical spontaneous emission and absorption spectrum

To theoretically analyze the strain induced emission enhancement factor, band structure is simulated with the 8 band  $k \cdot p$  method, which is detailed in ref. [3], and spontaneous emission rates and absorption coefficients are calculated with the above elaborated joint density of state (JDOS) model.

Figure S4(a) is the strain-dependent band structure evolution of Ge, showing a reducing difference between the direct bandgap at  $\Gamma$  point and the indirect bandgap at L point, which will increase the electron population in the  $\Gamma$  valley, resulting in the spontaneous emission enhancement. Figure S4(b) shows the spontaneous emission rate of as-grown Ge and Ge microbridges. For the cases of  $\epsilon_x = 1.6\%$  and  $\epsilon_x = 2.6\%$ , the integrated spontaneous emission rates are  $1.0 \times 10^{21} \text{ cm}^{-3}\text{s}^{-1}$  and  $3.0 \times 10^{21} \text{ cm}^{-3}\text{s}^{-1}$ , corresponding to enhancement factors of 2.4 and 7.3 comparing with the as-grown Ge. The calculated absorption coefficients of the as-grown Ge and Ge microbridge with uniaxial tensile strain of 2.6% are depicted in Fig. S4(c), comparing with the experimental data in ref. [4]. The main difference between the Ge microbridge and as-grown Ge is the edge of the absorption spectrum, locating at 2.1  $\mu\text{m}$  and 1.6  $\mu\text{m}$ , respectively.

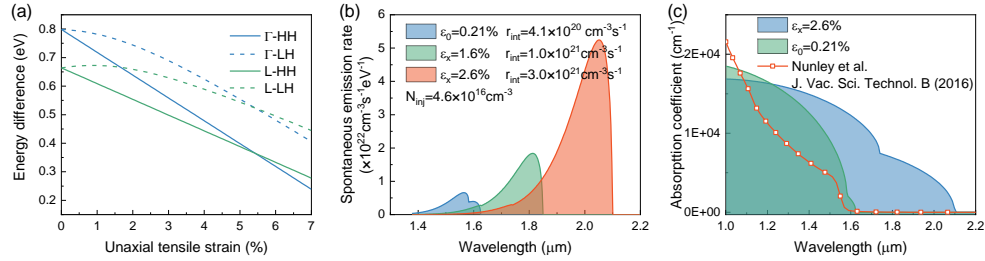

Figure S4. (a) Evolution of the band structure of germanium with uniaxial tensile strain. The energy differences between heavy hole (HH) and light hole (LH) and L, and direct bandgaps for HH and LH to  $\Gamma$  as the function of uniaxial tensile strain are calculated with the 8 band  $k \cdot p$  method combined with the deformation potential theory. (b) Simulation of the spontaneous emission rate with the joint density of state (JDOS) model. Calculation for the as-grown Ge with biaxial tensile strain of 0.21% and Ge microbridge of uniaxial tensile strain of 1.6% and 2.6% are performed, with injected carrier density of  $4.6 \times 10^{16} \text{ cm}^{-3}$ . (c) Calculated interband absorption for Ge with  $\langle 100 \rangle$  uniaxial tensile strain of 2.6% or biaxial tensile strain of 0.21% in comparison to experimental data[4].

## 5. Calculation of electron statistics

The electron population is calculated by integrating the product of the density of states in the conduction band and the Fermi-Dirac function:

$$N_{\Gamma,L} = \int_{-\infty}^{\infty} \rho_{\Gamma,L}(E) f_c(E) dE \quad (S10)$$

$$\rho_{\Gamma,L}(E) = \frac{1}{2\pi^2} \left( \frac{2m_{\Gamma,L}^*}{\hbar^2} \right)^{3/2} (E - E_{\Gamma,L})^{1/2}, E > E_{\Gamma,L} \quad (S11)$$

$$f_c(E) = \frac{1}{1 + \exp\left(\frac{E - \mu_e}{kT}\right)} \quad (S12)$$

Here,  $\mu_e$  is the electron quasi-Fermi level.  $E_{\Gamma}$  and  $E_L$  are the strain-dependent band edge energies for the  $\Gamma$  and L valley, respectively.  $k$  is the Boltzmann constant, and  $T$  is the temperature.  $m_{\Gamma}^*$  is the derived strain-dependent effective mass of electrons in  $\Gamma$  valley via 8 band  $k \cdot p$  method, while the  $m_L^*$  is assumed to be independent of strain.

## 6. Thermal stress and strain-enhancement factor related to dimensions

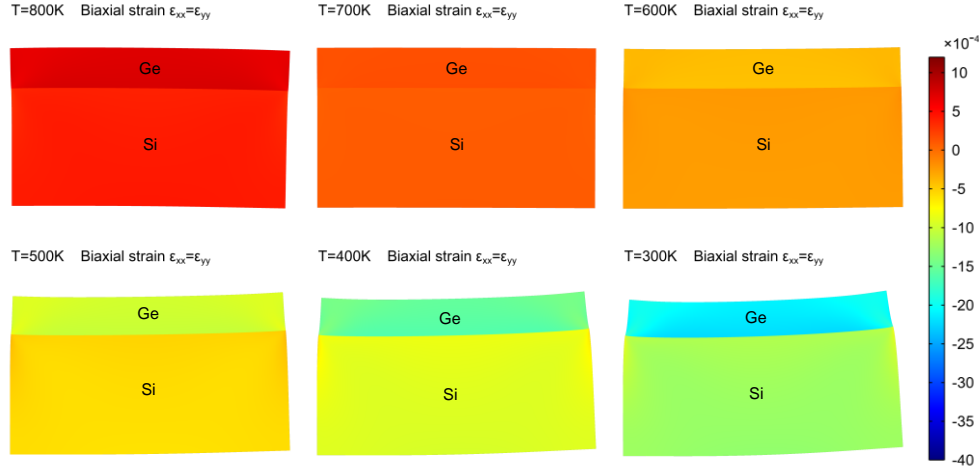

Figure S5. Evolution of strain in the as-grown Ge layer as cooling to room temperature, simulated with finite element method (FEM).

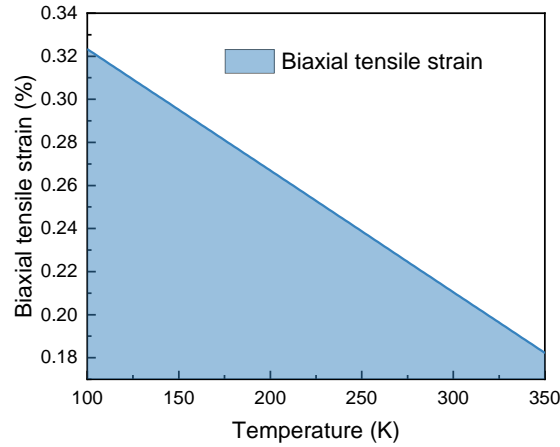

Figure S6. The biaxial tensile strain accumulation as cooling.

The Ge-on-SOI wafer used in this paper is grown at high temperature, with 400°C (673.15K) for the buffer layer and 600°C (873.15K) for the high-quality layer. When cooling to room temperature, biaxial tensile strain will generate in the Ge layer for its larger thermal expansion coefficient than Si. Figure S5 illustrates the simulated strain evolution in the as-grown Ge layer. As temperature decreases from 800K to 300K, the strain state of the material changes from the slight biaxial compressive strain ( $\varepsilon_0 = 0.05\%$ ) to the larger biaxial tensile strain ( $\varepsilon_0 = 0.2\%$ ). Figure S6 illustrates the biaxial tensile strain as a function of temperature from 100K to 350K. The strain value keeps accumulating as cooling.

Figure S7 depicts the strain concentration effect of the microbridge structure. The strain enhancement  $\varepsilon_x/\varepsilon_0$ , defined as the ratio of uniaxial tensile strain along the  $\langle 100 \rangle$  direction  $\varepsilon_x$  divided by the biaxial strain  $\varepsilon_0$  of the as-grown Ge layer, is related to the dimensions of the microbridge [5, 6]:

$$\varepsilon_x/\varepsilon_0 = C \times [1 + A/(B - A)] / [A/(B - A) + a/b] \quad (S13)$$

Here,  $A$ ,  $B$ ,  $a$  and  $b$  are structural parameters of microbridge as marked in Fig. S7.  $C$  is a correction factor to account for the influence of etching time and the waveguide on the bridge. In this paper, the strain parameter  $C$  is tuned by controlling the wet etching time for the bridge suspension to get different strain enhancement factor.

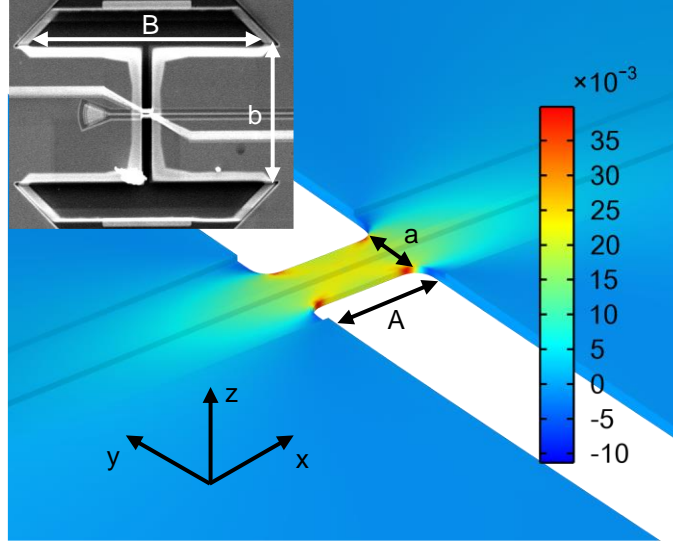

Figure S7. Uniaxial tensile strain  $\varepsilon_x$  in a Ge microbridge with ridge waveguide fabricated on it. Simulation is carried out with finite element method (FEM). The dimensions  $a$ ,  $A$ ,  $b$ ,  $B$  refer to the width and length of the microbridge, the pad width and the whole length of a single microbridge structure, respectively. Inset: SEM picture of a single suspended microbridge.

## 7. Calculation methods of the emission efficiency and responsivity

Figure S8(a)-S8(f) show the responsivity of the detector and transmissions of other components of the device and the EL system. The detector responsivity and transmissions of the objective and the planoconvex lens are given by their datasheets. The efficiency of the unsuspended grating coupler and the transmission of the surface grating are calculated with Finite Difference Time Domain (FDTD) method and Eigenmode Expansion (EME) method, respectively. The transmission of the 350  $\mu\text{m}$  waveguide can be calculated according to the absorption coefficient of the as-grown Ge:

$$T(\lambda) = \exp(-\alpha(\lambda)L) \quad (S14)$$

Here,  $T$  is the waveguide transmission.  $\lambda$  is the wavelength.  $\alpha$  is the absorption coefficient of the as-grown Ge shown in Fig. S4(c).  $L$  is the length of the waveguide.

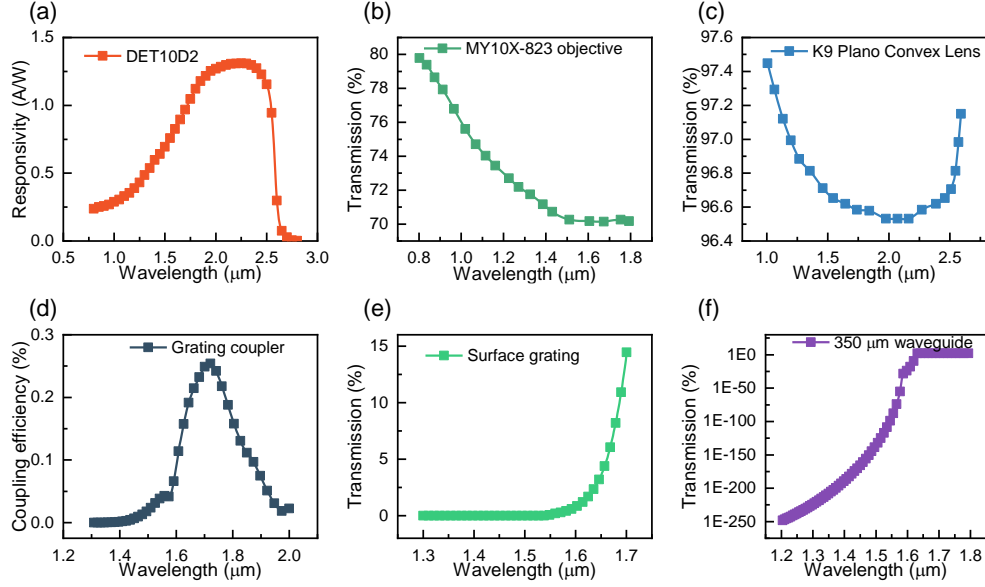

Figure S8. (a) Responsivity spectrum of the InGaAs detector. (b) Transmission of the long working distance Mitutoyo 0.26NA Near-IR objective. (c) Transmission of the K9 Plano Convex Lens. (d) Coupling efficiency of the grating coupler before suspension. (e) Transmission of the surface DBR grating. (f) Transmission of the waveguide with a length of 350  $\mu\text{m}$ .

The emission efficiency of the emitting microbridge can be derived by combining the above EL test result and the spontaneous emission rate  $R_{sp}$  calculated with the joint density of state (JDOS) model:

$$r_{sp}(\lambda) = R_{sp}(\lambda) I / \left( \int \frac{1.24}{\lambda} R_{sp}(\lambda) H(\lambda) R_{InGaAs}(\lambda) d\lambda \right) \quad (S15)$$

$$\eta_q = \left( \int r_{sp}(\lambda) d\lambda \right) / (I/q) \quad (S16)$$

Here,  $r_{sp}$  is the spontaneous emission rate of the emitting microbridge.  $I$  is the injected current.  $H$  is the transmission function of the system, including the transmission spectrum of the surface DBR grating, a 350  $\mu\text{m}$  waveguide, the coupling grating, the objective and the planoconvex lens.  $R_{InGaAs}$  is the responsivity of the InGaAs detector.  $q$  is the electron charge.  $\eta_q$  is the emission efficiency of the emitting microbridge. The calculated emission efficiency of the unsuspended emitting microbridge with biaxial tensile strain of 0.21% is 0.48%. For the suspended device with uniaxial tensile strain of 2.6%, the integrated spontaneous emission rate is 7.3 times larger than the unsuspended case, so the emission efficiency is 3.50%.

Figure S9 shows the dependence of the output of the detecting microbridge on the current density injected into the emitting microbridge with uniaxial tensile strain of 2.6%. When the injected current density is under 0.3 kA/cm<sup>2</sup>, almost no carriers are injected into the  $\Gamma$  valley, leading to a weak light emission, as well as the small output from the detecting microbridge. As injected current keeping increasing, more carriers get into the  $\Gamma$  valley to facilitate light emission. The output signal of the detecting microbridge also rises significantly.

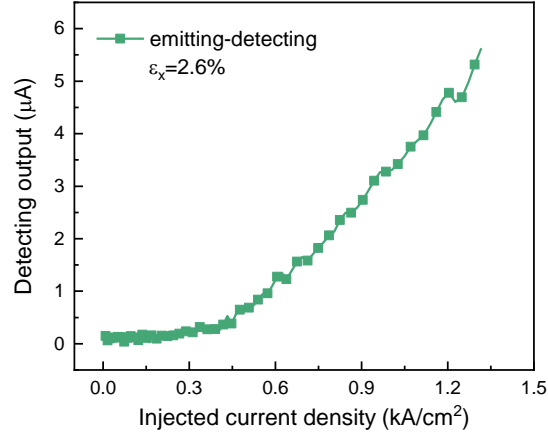

Figure S9. Detecting output as a function of the injected current density of the emitting-detecting configuration with uniaxial tensile strain  $\varepsilon_x=2.6\%$ .

In the highly strained device, the emitting light is beyond the absorption range of the waveguide and surface grating, which has been elaborated above. Then, the responsivity of the detecting microbridge can be calculated with the following equations:

$$R_m(\lambda) = (R_t(\lambda) I_m) / \left( \int \frac{1.24}{\lambda} r_{sp}(\lambda) R_t(\lambda) d\lambda \right) \quad (S17)$$

$$R_t(\lambda) = \frac{\lambda}{1.24} (1 - \exp(-\alpha(\lambda) L_m)) \quad (S18)$$

Here,  $R_m$  is the responsivity of the detecting microbridge.  $R_t$  is the theoretical line shape of the responsivity.  $I_m$  is the output current of the detecting microbridge.  $\alpha$  is the absorption coefficient shown in the Supporting Information.  $L_m$  is the length of the microbridge. The responsivities of microbridges with biaxial tensile strain of 0.21% and uniaxial tensile strain of 2.6% are displayed in Fig. S10. The highly strained Ge microbridge has higher responsivity at long wavelength. The red shift of the cut-off wavelength corresponds to the band gap shrinkage.

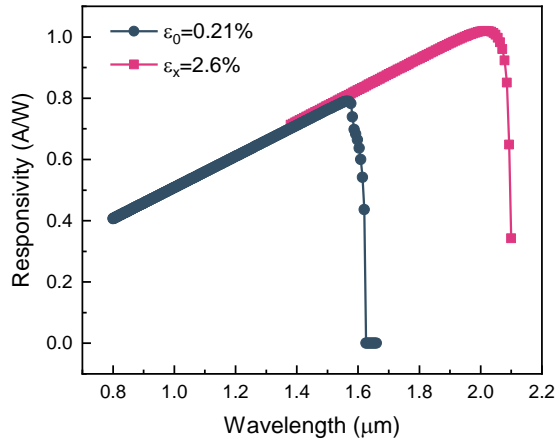

Figure S10. Responsivity of Ge microbridge detectors with strain values of  $\varepsilon_0=0.21\%$  and  $\varepsilon_x=2.6\%$ , respectively.



## 8. Reverse bias dependence of the detecting microbridge

The dependence of the detecting microbridge responsivity on the reverse bias voltage is explored. The test is performed on a device with uniaxial tensile strain of 2.6%, using the experimental set-up shown in Fig. S8. The reverse bias voltage of the detecting microbridge is tuned from 0V to 0.3V. The injected current of the emitting microbridge is fixed, as well as the light emission intensity. As shown in Fig. S11, the detecting output current is maintained between the range of 0.5  $\mu$ A to 0.7  $\mu$ A, with a fluctuation of 15%.

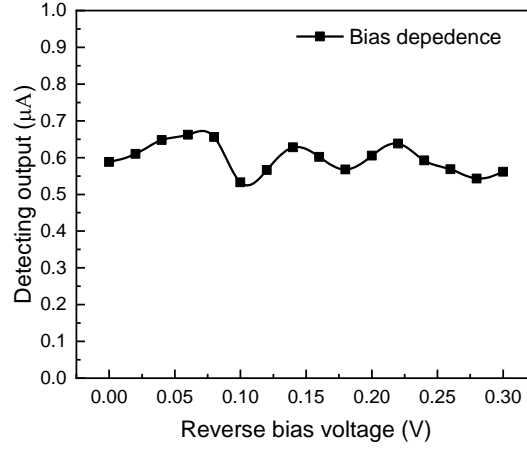

Figure S11. Output from the detecting microbridge as a function of the reverse bias voltage under a fixed current injected into the emitting microbridge.

## 9. Electrical circuit of the emitting-detecting test

The electrical circuit of the emitting-detecting test shown in Fig. S8 is illustrated in Fig. S12(a). The emitting diode  $D_1$  is forward biased for light emission.  $D_2$  is reversed biased to convert optical signals into current  $I_{PD}$ .  $R_s$  is the series resistance of the diode. A resistance  $50 \Omega$  is used to change  $I_{PD}$  into voltage signals.  $R_{load}$  is the load resistance of the lock-in amplifier.

There can be cross-talk between the emitting circuit and the detecting circuit due to the imperfect electrical insulation between the two different parts. To estimate such cross-talk, the electrical is changed as depicted in Fig. S12(b). The emitting diode  $D_1$  is reversely biased to turn off the light emission, and there is only cross-talk electrical signals can be tested from the detecting part of the system. During the test, the output of the lock-in amplifier keeps fluctuating, and no effective data can be obtained, which means the cross-talk is smaller than the testing accuracy of the system and will not have influence on the testing results.

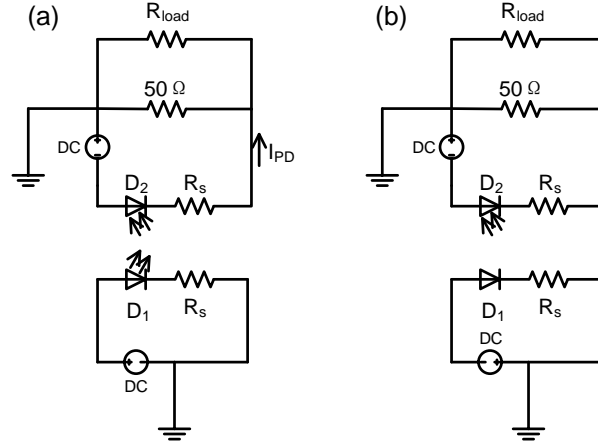

Figure S12. (a) The electrical circuit of the emitting-detecting test system, with the emitting microbridge forward biased. (b) The electrical circuit of the cross-talk test system, with the emitting microbridge reverse biased to prevent it from glowing.

## 10. Material inhomogeneity at the edge of the microbridge structure

As shown in Fig. S13(a), there are bright contrast regions around the microbridge structures, which is caused by the material inhomogeneity at the structure edge, displayed more clearly in the microscope image of Fig. S13(b). During the fabrication process, several  $\text{SiO}_x$  layer deposition and wet etching steps are performed. The deposition and etching rates at the edge regions are slightly different from the central area, which leads to the thickness difference of the  $\text{SiO}_x$  layer. Besides, gravity and stress in the structure will tilt the edges of the microbridge structure. These factors mentioned above contribute to the inhomogeneity at the edge of the microbridge structure.

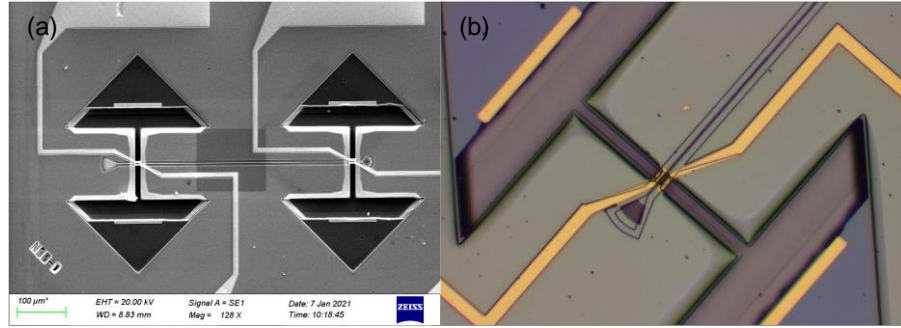

Figure S13. (a) SEM image of the device. (b) Microscope image of a suspended microbridge.

## 11. Material parameters used in the carrier density simulation

The calculation of the carrier density from the injected current density is performed using the finite element method. The material parameters used in the simulation are listed in Table S3, which are modified from the data in ref. [7] according to the strain value and doping concentrations.

**Table S3. Material parameters used in the carrier density simulation**

| Parameters                                                                       | p-region              | active region         | n-region              |
|----------------------------------------------------------------------------------|-----------------------|-----------------------|-----------------------|
| Band gaps (eV)                                                                   | 0.5280                | 0.5280                | 0.5280                |
| Affinities (eV)                                                                  | 4.0189                | 4.0189                | 4.0189                |
| Electron DOS effective masses ( $m_0$ )                                          | 0.1243                | 0.1243                | 0.1243                |
| Hole DOS effective masses ( $m_0$ )                                              | 0.55                  | 0.55                  | 0.55                  |
| Electron mobilities ( $\text{m}^2\text{V}^{-1}\text{s}^{-1}$ )                   | 0.0120                | 0.3900                | 0.0355                |
| Hole mobilities ( $\text{m}^2\text{V}^{-1}\text{s}^{-1}$ )                       | 0.0121                | 0.5655                | 0.0365                |
| SRH lifetimes (ns)                                                               | 3                     | 3                     | 3                     |
| Auger recombination coefficients $C_{\text{eeh}}$ ( $\text{cm}^6\text{s}^{-1}$ ) | $1.4 \times 10^{-30}$ | $1.4 \times 10^{-30}$ | $1.4 \times 10^{-30}$ |
| Auger recombination coefficients $C_{\text{hhe}}$ ( $\text{cm}^6\text{s}^{-1}$ ) | $2 \times 10^{-31}$   | $2 \times 10^{-31}$   | $2 \times 10^{-31}$   |

## 12. Simulation of joule heating effect

The temperature of the active region will increase due to the joule heating effect as current injected. Figure S14 gives the temperature comparison of the suspended and unsuspended devices under different injected current densities.

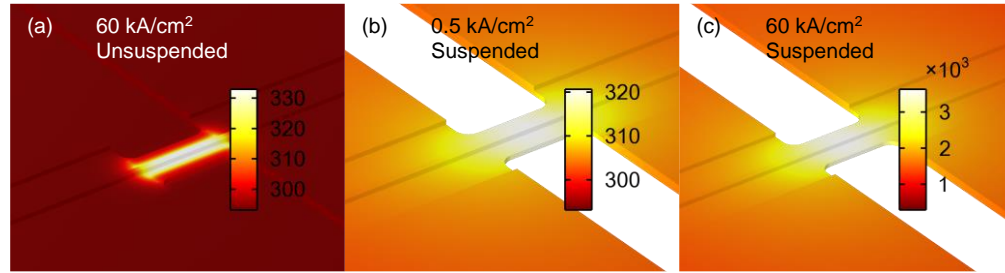

Figure S14. Temperature comparison of suspended and unsuspended devices under different injected current densities. (a) Unsuspended device with injected current density of  $60 \text{ kA/cm}^2$ . (b) Suspended device with injected current density of  $0.5 \text{ kA/cm}^2$ . (c) Suspended device with injected current density of  $60 \text{ kA/cm}^2$ .

In EL test, because of the low efficiency of the coupling grating, it is necessary to increase the electric injection to enhance the luminescence and compensate for the loss. Figure S14(a) presents the temperature in the unsuspended device under a current injection density of  $60 \text{ kA/cm}^2$ . Although the current injection is at a high level, the heat can be carried away by the substrate, so that the active region can keep in a moderate temperature of 330 K. But for a suspended device, without the thermal conduction of the substrate, heat can be easily accumulated in the active region, leading to a high temperature, as shown in Fig. S14(c). Such a high temperature can easily damage the p-i-n diode. To keep the temperature in a reasonable range, the injected current density is limited for the suspended device. In Fig. S14(b), an injected current density of  $0.5 \text{ kA/cm}^2$  only results in a temperature of 320 K for suspended device. It should be noticed that although the temperature of the active region changes in a wide

range with different injected current densities, the strain value can still keep stable because the larger area of pad regions is at room temperature.

### 13. References

1. R. Yujiao, C. Chengzhao, H. Shihao, H. Wei, C. Songyan, L. Cheng, and L. Jun, "Influence of implantation damages and intrinsic dislocations on phosphorus diffusion in Ge," *IEEE Trans. Electron Devices* **60**, 3741-3745 (2013).
2. A. Gassenq, S. Tardif, K. Guillo, I. Duchemin, N. Pauc, J. M. Hartmann, D. Rouchon, J. Widiez, Y. M. Niquet, L. Milord, T. Zabel, H. Sigg, J. Faist, A. Chelnokov, F. Rieutord, V. Reboud, and V. Calvo, "Raman-strain relations in highly strained Ge: Uniaxial  $\langle 100 \rangle$ ,  $\langle 110 \rangle$  and biaxial (001) stress," *J. Appl. Phys.* **121**, 055702-055710 (2017).
3. J. Jiang, M. Xue, C.-Y. Lu, C. S. Fenrich, M. Morea, K. Zang, J. Gao, M. Cheng, Y. Zhang, T. I. Kamins, J. S. Harris, and J. Sun, "Strain-induced enhancement of electroluminescence from highly strained germanium light-emitting diodes," *ACS Photonics* **6**, 915-923 (2019).
4. T. N. Nunley, N. S. Fernando, N. Samarasingha, J. M. Moya, C. M. Nelson, A. A. Medina, and S. Zollner, "Optical constants of germanium and thermally grown germanium dioxide from 0.5 to 6.6eV via a multisample ellipsometry investigation," *Journal of Vacuum Science & Technology B, Nanotechnology and Microelectronics: Materials, Processing, Measurement, and Phenomena* **34**, 061205-061213 (2016).
5. R. A. Minamisawa, M. J. Suess, R. Spolenak, J. Faist, C. David, J. Gobrecht, K. K. Bourdelle, and H. Sigg, "Top-down fabricated silicon nanowires under tensile elastic strain up to 4.5%," *Nat. Commun.* **3**, 1096-1101 (2012).
6. T. Zabel, R. Geiger, E. Marin, E. Müller, A. Diaz, C. Bonzon, M. J. Stüss, R. Spolenak, J. Faist, and H. Sigg, "Top-down method to introduce ultra-high elastic strain," *J. Mater. Res.* **32**, 726-736 (2017).
7. J. Jiang, J. Sun, Y. Zhou, J. Gao, H. Zhou, and R. Zhang, "Design and analysis of a CMOS-compatible distributed Bragg reflector laser based on highly uniaxial tensile stressed germanium," *Opt. Express* **25**, 6497-6510 (2017).
