# Supplementary material for: Monolithic integrated emitting-detecting configuration based on strained Ge microbridge
Source: publisher site journal article supplement (doi:10.1515/nanoph-2021-0122), 2021-08-13
Supplement: Supplementary file 1 [file j_nanoph-2021-0122_suppl_003.docx]

Monolithic integrated emitting-detecting configuration based on strained Ge microbridge

Senbiao Qin, Junqiang Sun,* Jialin Jiang, Yi Zhang, Ming Cheng, Linfeng Yu, Kang Wang, Li Kai, Haotian Shi and Qiang Huang

Wuhan National Laboratory for Optoelectronics, School of Optics and Electronic Information, Huazhong University of Science and Technology, Wuhan 430074, China

*Corresponding author: Junqiang Sun, E-mail: [jqsun@hust.edu.cn](mailto:jqsun@hust.edu.cn)

This file contains:

1. Ion implantations
2. Grating design
3. Strain calculation method
4. Joint density of state (JDOS) model
5. Calculation of electron statistics
6. Thermal stress and strain-enhancement factor related to dimensions
7. Experimental scheme
8. References
9. Ion implantations

BF2+ and P+ implantations are performed to construct the lateral p-i-n junctions. Implantation parameters are listed in Table S1. As shown in Fig. S1, the concentrations of active dopants present Gaussian distribution for both n-type and p-type. After the annealing process, the active concentration in the p-region is on the order of 1020 cm-3. For the p-region, the high diffusivity of phosphorus in Ge limits the active concentration to the order of 1019 cm-3 [1].

Figure S1. Active dopants concentration (logarithmic scale).

Table S1. Parameters of BF2+ and P+ implantations

| Ion | Implanted dose/cm-2 | Energy/keV | Angle/° | Projected Range/nm | Junction depth/nm |
| --- | --- | --- | --- | --- | --- |
| BF2+ (p-type doping) | 2×1015 | 50 | 7 | 40 | 200 |
| P+ (n-type doping) | 2×1015 | 40 | 7 | 40 | 200 |

1. Grating design

Figure S2(a)-S2(c) show the schematics of the side and top view of the focusing DBR grating, the grating coupler and the surface DBR grating. Dimension parameters are optimized with finite difference time domain (FDTD) method. As illustrated in Fig. S2(d), coupling efficiency of the grating coupler and reflection spectrums of the two DBR gratings are optimized to match the electroluminescence of a Ge microbridge with uniaxial tensile strain of 1.76%. The wavelength of the reflection peak of the surface grating is consistent with the electroluminescence maximum, locating at 1.85 μm, where the grating coupler has an efficiency of 20%. Additionally, the focusing grating has a flat reflection spectrum over a wide range of wavelength, which is easy for a narrow surface grating reflection spectrum to align with, improving the fabrication robust [2].

Figure S2. Schematics of gratings and the corresponding characteristics. (a) Focusing DBR grating. (b) Grating coupler. (c) Surface DBR grating. Dimension parameters are marked. (d) Coupling efficiency of grating coupler, reflection of focusing grating and surface grating and their alignment with the EL spectrum of a Ge microbridge of 1.76% uniaxial tensile strain [3].

1. Strain calculation method

X-ray diffraction (XRD) and Raman spectroscopy are performed for characterization of the strain. The biaxial tensile strain in the as-grown Ge layer is determined form the location of the Ge peak in the X-ray rocking curve. For the given Ge <004> lattice planes with an inter-plane distance of *d004*, the condition for a diffraction peak to occur can be determined by the Bragg’s law:

where *θ* is the diffraction angle. *n* is an integer representing the order of the diffraction peak. *λ* = 0.15406 nm is the wavelength of the X-ray. A diffraction peak of Ge locating at 2*θ* = 66.107° represents an inter-plane distance of 1.4123 Å. Due to the tetragonal crystal structure, the inter-plane distance of the <001> crystal orientation *d*001can be derived as follows:

Here, *h*, *k* and *l* are Miller indices. *d*001 = 5.6492 Å, indicating a compressive strain of 0.156% in the z direction comparing with the lattice constant of 5.658 Å in the relaxed Ge layer. The relationship between strain components of *εxx*, *εyy* and *εzz* can be described as the following equations:

Here, elastic constants *C11* and *C12* are 128.53 GPa and 48.26 GPa in the Ge layer, respectively.

The relationship between the location of the Raman spectra and the strain value in Ge layer has been explored in ref. [4]:

Here, *a* and *b* are coefficients with different values for biaxial and uniaxial tensile strain (see Table S2).

Table S2. Coefficients in strain characterization with Raman spectroscopy

| Strain type | a | b |
| --- | --- | --- |
| Biaxial tensile strain in x-y plane | 0.23 | 0 |
| Uniaxial tensile strain in the lattice orientation of <100> | 0.68 | -0.019 |

1. Joint density of state (JDOS) model

The spontaneous emission rate and interband absorption spectra are calculated by the joint density of state (JDOS) model:

where *nr* is the refractive index. *ω* is the angular frequency of the photon. *ℏ* is the reduced Planck constant. *c* is the light speed in the vacuum. *e* and *m0* are the electron charge and mass, respectively. *ε0* is the permittivity in the vacuum. *mr* is the reduced mass of electrons in conduction band. *Eg* is the bandgap. is the momentum matrix element. represents the joint density of state. *fc* and *fv* are the Fermi-Dirac functions of the conduction band and valence band, respectively. Both transitions for Γ-HH and Γ-LH have to be taken into consideration.

1. Calculation of electron statistics

The electron population is calculated by integrating the product of the density of states in the conduction band and the Fermi-Dirac function:

Here, *μe* is the electron quasi-Fermi level. *EΓ* and *EL* are the strain-dependent band edge energies for the Γ and L valley, respectively. *k* is the Boltzmann constant, and *T* is the temperature. *mΓ** is the derived strain-dependent effective mass of electrons in Γ valley via 8 band *k∙p* method, while the *mL** is assumed to be independent of strain.

1. Thermal stress and strain-enhancement factor related to dimensions

Figure S3. Evolution of strain in the as-grown Ge layer as cooling to room temperature, simulated with finite element method (FEM).

The Ge-on-SOI wafer used in this paper is grown at high temperature, with 400℃ (673.15K) for the buffer layer and 600℃ (873.15K) for the high-quality layer. When cooling to room temperature, biaxial tensile strain will generate in the Ge layer for its larger thermal expansion coefficient than Si. Figure S3 illustrates the simulated strain evolution in the as-grown Ge layer. As temperature decreases from 800K to 300K, the strain state of the material changes from the slight biaxial compressive strain (*ε*0 = 0.05%) to the larger biaxial tensile strain (*ε*0 = 0.2%).

Figure S4 depicts the strain concentration effect of the microbridge structure. The strain enhancement *εx*/*ε*0, defined as the ratio of uniaxial tensile strain along the <100> direction *εx* divided by the biaxial strain *ε*0 of the as-grown Ge layer, is related to the dimensions of the microbridge [5, 6]:

Here, *A*, *B*, *a* and *b* are structural parameters of microbridge as marked in Fig. S4. *C* is a correction factor to account for the influence of etching time and the waveguide on the bridge. In this paper, the strain parameter *C* is tuned by controlling the wet etching time for the bridge suspension to get different strain enhancement factor.

Figure S4. Uniaxial tensile strain *εx* in a Ge microbridge with ridge waveguide fabricated on it. Simulation is carried out with finite element method (FEM). The dimensions a, A, b, B refer to the width and length of the microbridge, the pad width and the pad length, respectively. Inset: SEM picture of a single suspended microbridge.

1. Experimental scheme

A lock-in amplifier scheme is adopted in the test of the emitting-detecting configuration device. As presented in Fig. S5, the emitting part is powered by a function signal generator with a 1kHz square wave excitation signal. The duty cycle is tuned to 20% to reduce the average output power to protect the device under test (DUT). The detecting part is reversely biased by a digital source meter at the voltage of 0.2V. A resistance of 50 Ω is employed in the circuit to convert the photocurrent into a voltage signal. Since the photocurrent is on the order of microamperes, the reverse bias voltage fluctuation at the detecting end caused by the voltage change at both ends of the resistance is negligible. The signal generated at the detecting end is extracted from the noise by phase-sensitive detection with the lock-in amplifier. The DUT is placed on a thermo electric cooler (TEC) to adjust its temperature.

Figure S5.Schematic of the experimental set-up, highlighting the main elements: Lock-in amplifier, Function signal generator, Digital source meter, resistance of 50 Ω, device with emitting-detecting configuration under test on the thermo electric cooler (TEC).

1. References

1. R. Yujiao, C. Chengzhao, H. Shihao, H. Wei, C. Songyan, L. Cheng, and L. Jun, "Influence of Implantation Damages and Intrinsic Dislocations on Phosphorus Diffusion in Ge," IEEE Trans. Electron Devices **60**, 3741-3745 (2013).

2. J. Jiang, J. Sun, J. Gao, and R. Zhang, "Analysis of threshold current of uniaxially tensile stressed bulk Ge and Ge/SiGe quantum well lasers," Opt. Express **25**, 26714-26727 (2017).

3. J. Jiang, M. Xue, C.-Y. Lu, C. S. Fenrich, M. Morea, K. Zang, J. Gao, M. Cheng, Y. Zhang, T. I. Kamins, J. S. Harris, and J. Sun, "Strain-Induced Enhancement of Electroluminescence from Highly Strained Germanium Light-Emitting Diodes," ACS Photonics **6**, 915-923 (2019).

4. A. Gassenq, S. Tardif, K. Guilloy, I. Duchemin, N. Pauc, J. M. Hartmann, D. Rouchon, J. Widiez, Y. M. Niquet, L. Milord, T. Zabel, H. Sigg, J. Faist, A. Chelnokov, F. Rieutord, V. Reboud, and V. Calvo, "Raman-strain relations in highly strained Ge: Uniaxial ⟨100⟩, ⟨110⟩ and biaxial (001) stress," J. Appl. Phys. **121**, 055702 (2017).

5. R. A. Minamisawa, M. J. Suess, R. Spolenak, J. Faist, C. David, J. Gobrecht, K. K. Bourdelle, and H. Sigg, "Top-down fabricated silicon nanowires under tensile elastic strain up to 4.5%," Nat. Commun. **3**, 1096 (2012).

6. T. Zabel, R. Geiger, E. Marin, E. Müller, A. Diaz, C. Bonzon, M. J. Süess, R. Spolenak, J. Faist, and H. Sigg, "Top-down method to introduce ultra-high elastic strain," J. Mater. Res. **32**, 726-736 (2017).
